# Supplementary material
Source: PubMed Central journal article supplement (PMC5677226)
Supplement: NIHMS913481-supplement-supplement_1.pdf [file NIHMS913481-supplement-supplement_1.pdf]

## Supplementary Information

For: **Coupled dynamics of body mass and population growth in response to environmental change** by Arpat Ozgul, Dylan Z. Childs, Madan K. Oli, Kenneth B. Armitage, Daniel T. Blumstein, Lucretia E. Olson, Shripad Tuljapurkar, Tim Coulson

Correspondence and requests for materials should be addressed to A.O.

([a.ozgul@imperial.ac.uk](mailto:a.ozgul@imperial.ac.uk))

Table S1. Statistical models and parameter estimates describing the relationship between August 1<sup>st</sup> body mass and demographic and trait transition rates. The models include the main effects of log-body mass  $x$  and period  $p$  ( $\geq 2000$ ), and their interaction effect  $xp$ ; values in parentheses are standard errors of parameter estimates. The predicted values are the survival probability  $S$ , reproduction probability  $R$  conditional on survival, litter size  $L$  conditional on reproduction, conditional mean of log-body mass next year  $G$  given current mass, and conditional mean of log-offspring body mass next year  $Q$  given current mass. Subscripts indicate the age classes that the functions apply to. Function  $f(x | p)$  is a standard smoothing function of  $x$  including the interaction effect of  $p$  with the given degrees of freedom  $df$  for each level of  $p$ . Superscript \* indicates significance (at  $\alpha=0.05$ ) of each term based on the likelihood ratio comparison with the reduced models.  $n$  indicates the corresponding sample sizes. Logit(Y) indicates binomial regression using logit link, whereas Log(E(Y)) indicates Poisson regression using log-transformed expected values.

| Function                 | Model              | Fitted GLM / GAM                                                                | $n$  |
|--------------------------|--------------------|---------------------------------------------------------------------------------|------|
| Survival probability     | Logit( $S_1$ )     | $-8.21_{(1.65)} + 1.25_{(0.24)} x^* - 4.59_{(4.42)} p + 0.66_{(0.64)} xp$       | 927  |
|                          | Logit( $S_{2+}$ )  | $-17.80_{(2.30)} + 2.31_{(0.29)} x^* - 14.90_{(4.71)} p^* + 1.91_{(0.59)} xp^*$ | 1401 |
| Reproduction probability | Logit( $R_2$ )     | $3.89_{(9.44)} - 0.68_{(1.21)} x - 43.57_{(22.27)} p + 5.50_{(2.79)} xp^*$      | 273  |
|                          | Logit( $R_{3+}$ )  | $3.08_{(7.73)} - 0.39_{(0.96)} x - 22.01_{(13.26)} p + 2.73_{(1.63)} xp^*$      | 604  |
| Litter size              | Log(E( $L_{2+}$ )) | $-5.07_{(1.94)} + 0.74_{(0.24)} x^* - 0.83_{(3.46)} p - 0.10_{(0.43)} xp$       | 358  |
| Ontogenic growth         | $G_1$              | $7.84_{(0.01)} + 0.11_{(0.01)} p^* + f(x^*   p^*_{df: 5.08, 2.16})$             | 400  |
|                          | $G_2$              | $4.97_{(0.53)} + 0.39_{(0.07)} x^* - 1.17_{(1.19)} p + 0.14_{(0.15)} xp$        | 210  |
|                          | $G_{3+}$           | $1.66_{(0.29)} + 0.80_{(0.04)} x^* + 1.81_{(0.48)} p - 0.22_{(0.06)} xp^*$      | 501  |
| Offspring mass           | $Q_{2+}$           | $1.99_{(0.98)} + 0.60_{(0.12)} x^* + 0.20_{(1.76)} p - 0.02_{(0.22)} xp$        | 339  |

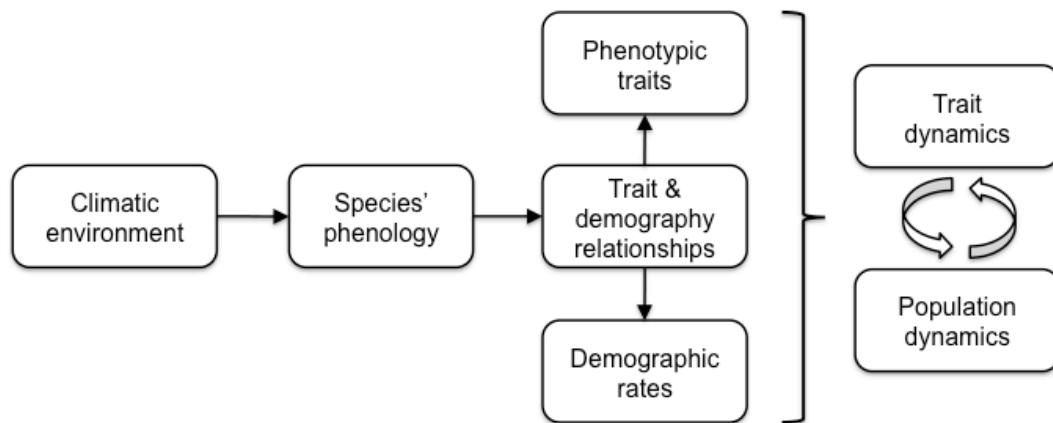

Figure S1. A change in the climatic environment can lead to a change in a species' phenology and in the relationship between traits and demographic rates. Such a change can have direct effects on the phenotypic traits (e.g., body size) and demographic rates (e.g., survival and reproduction). In this study, we demonstrate the exact mechanism through which these changes have led to a remarkable shift in the joint dynamics of population size and trait distributions in a yellow-bellied marmot population.

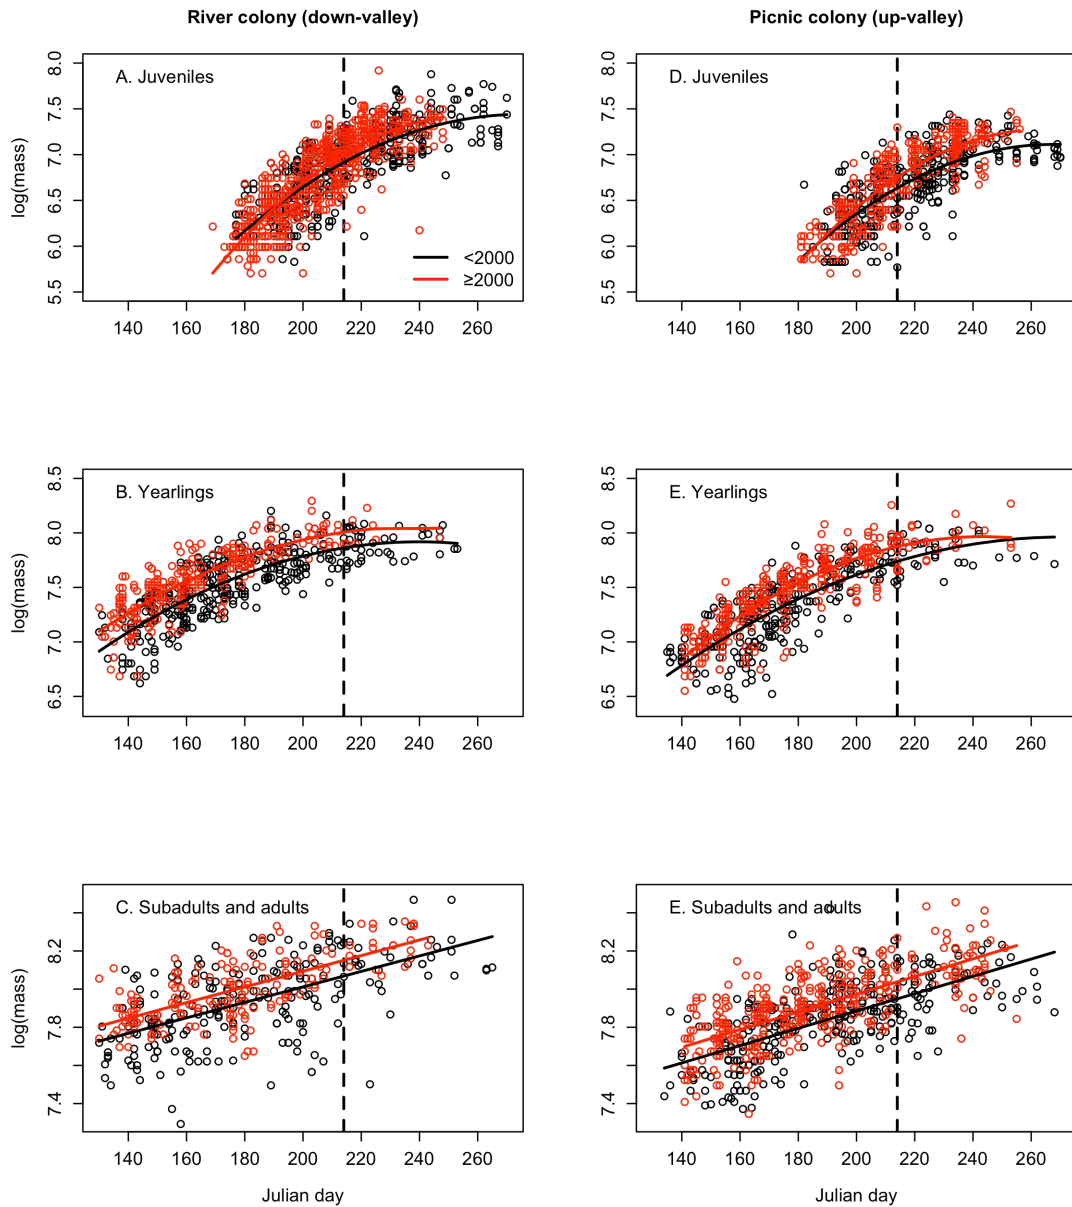

Figure S2. The relationship between day-of-year and log-body mass in two largest colony sites. The fitted mixed-effect models include quadratic relationship for juveniles and yearlings and linear relationship for older age classes. The vertical lines indicate August 1<sup>st</sup> (214<sup>th</sup> day-of-year), the date for which the body masses were estimated.

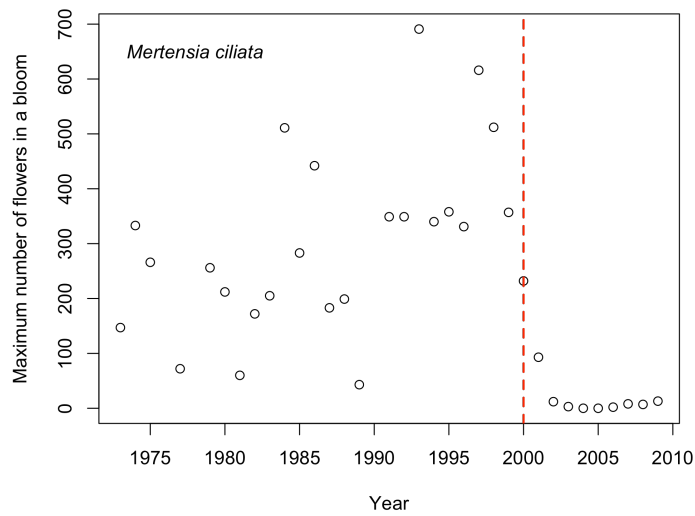

Figure S3. There has been a sharp decline in the maximum number of flowers in a bloom of the blue bell, *Mertensia ciliata*, suggesting a general environmental shift in the study area during the last decade (David Inouye, unpublished data).

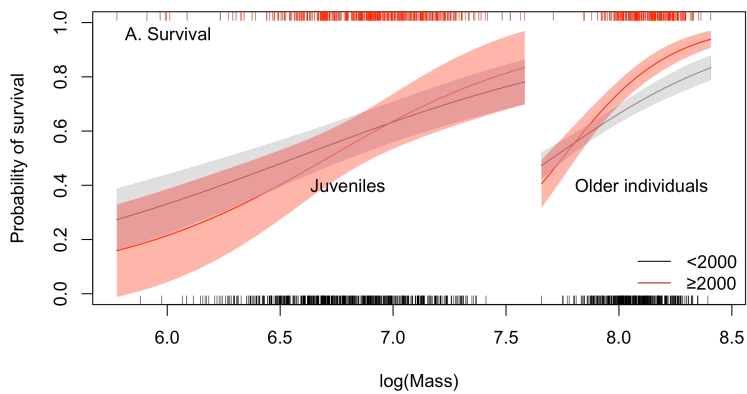

Figure S4. The relationship between body mass and survival for <2000 and  $\geq 2000$  years. Shaded areas indicate the 95% confidence intervals, and rugs above and below the graph represent the distribution of the body mass data.

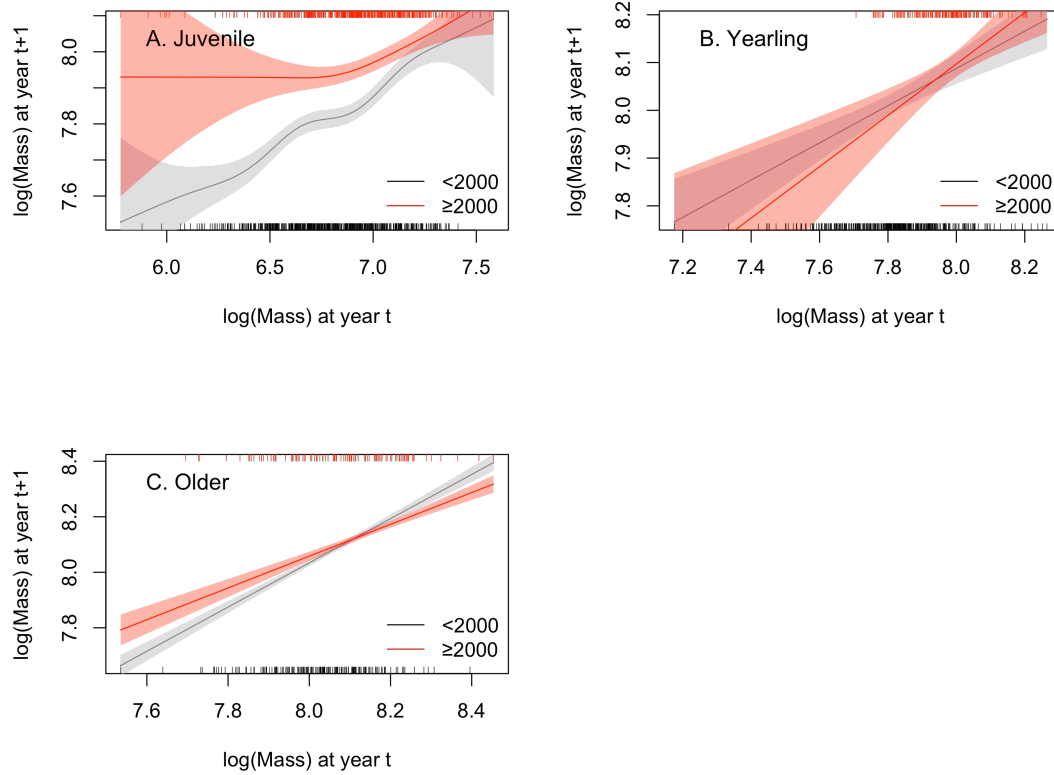

Figure S5. The relationship between body mass and age-specific growth for  $<2000$  and  $\geq 2000$  years. Shaded areas indicate the 95% confidence intervals, and rugs above and below the graph represent the distribution of the body mass data.

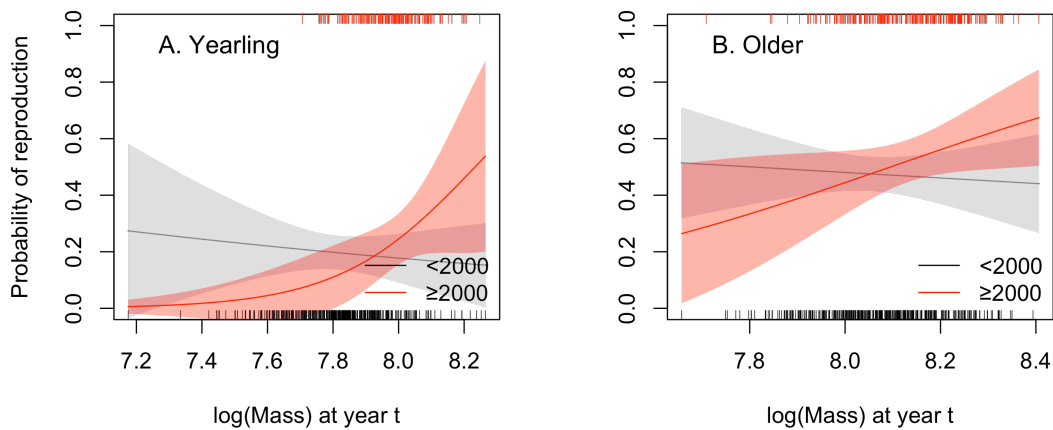

Figure S6. The relationship between body mass and age-specific probability of reproduction for  $<2000$  and  $\geq 2000$  years. Shaded areas indicate the 95% confidence intervals, and rugs above and below the graph represent the distribution of the body mass data.

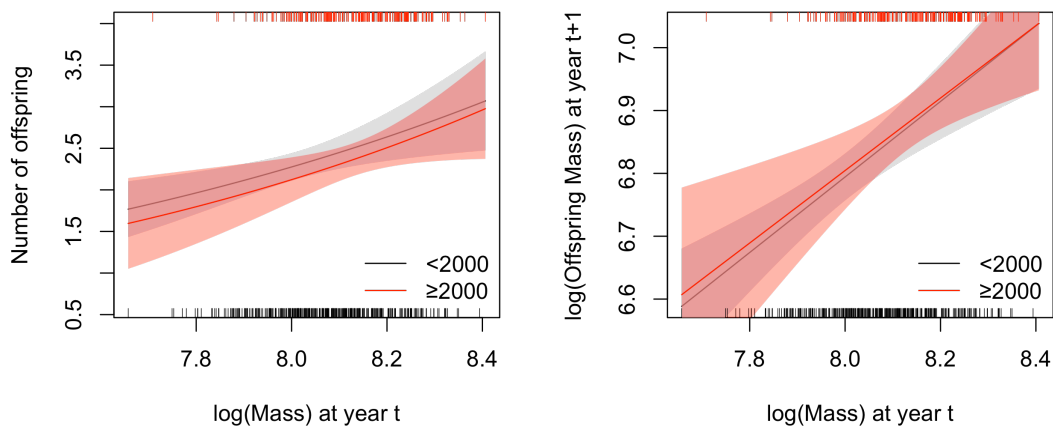

Figure S7. The relationship between body mass and (A) number of offspring produced and (B) offspring mass for  $<2000$  and  $\geq 2000$  years. Shaded areas indicate the 95% confidence intervals, and rugs above and below the graph represent the distribution of the body mass data.

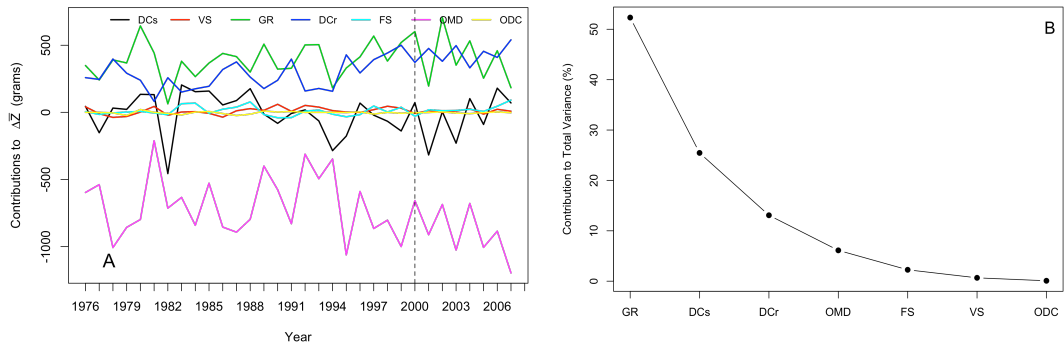

Figure S8. (A) Time-series of the contributions of different terms to  $\Delta\bar{Z}$  summed across all ages, and (B) the percentage contribution of each term to the observed total variation in  $\Delta\bar{Z}$  (see *Methods* for definition of abbreviations).
